# Supplementary material
Source: PubMed Central journal article supplement (PMC5050049)

**SI Figure 1. Effects of 5-azaC on polyamine pathway gene expression.** AGS cells were treated with 5-azacytidine (5-azaC) every 48 h (3 treatments total). RNA expression levels were quantified using qRT-PCR with primers specific to *ODC1* (A), *SRM* (B), *AMD1* (C), *SMS* (D), or *SAT1* (E), relative to *GAPDH*. Columns indicate the means ( $n = 3$ ) with error bars indicating SEM. \* $p < 0.05$  versus untreated.

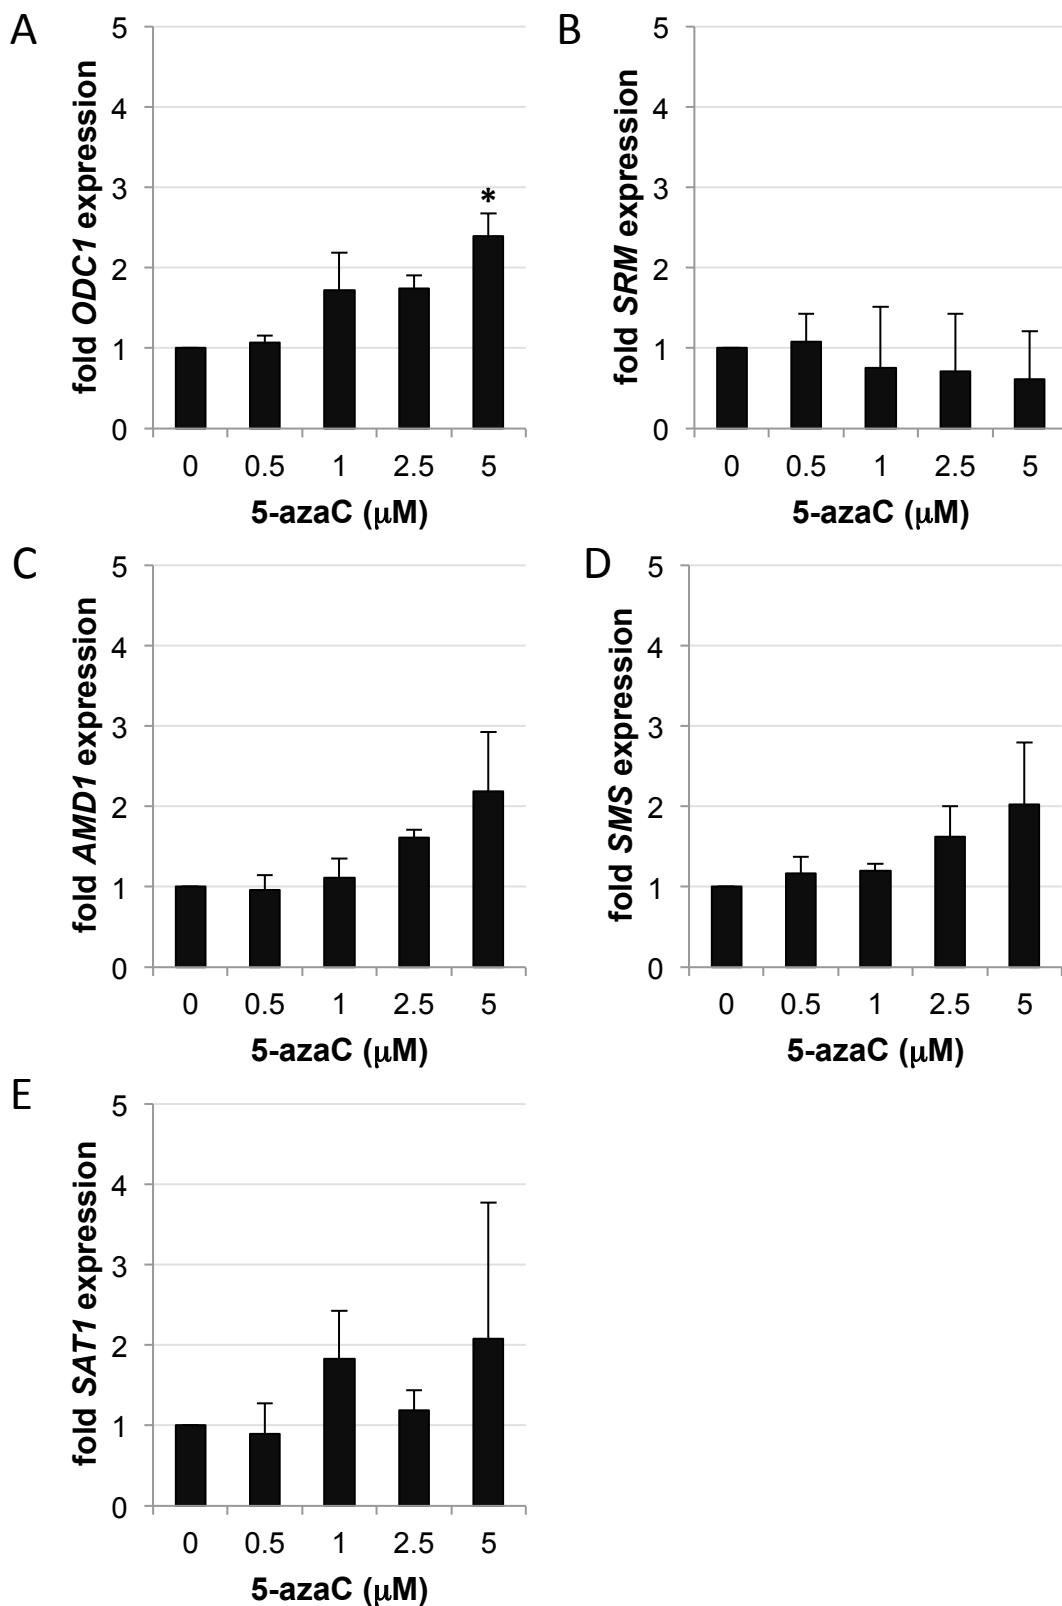

Supplement: NIHMS749206-supplement-1.pdf [file NIHMS749206-supplement-1.pdf]
